# Supplementary material
Source: Springer Nature journal article supplement (https://www.springermedizin.de/resource/supplementary/12943_2013_1219_MOESM2_ESM.pdf/9552420)

**A**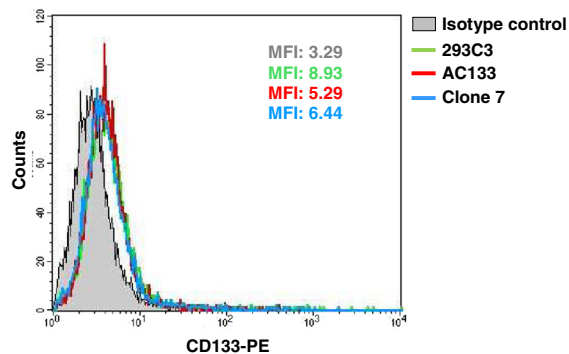**B**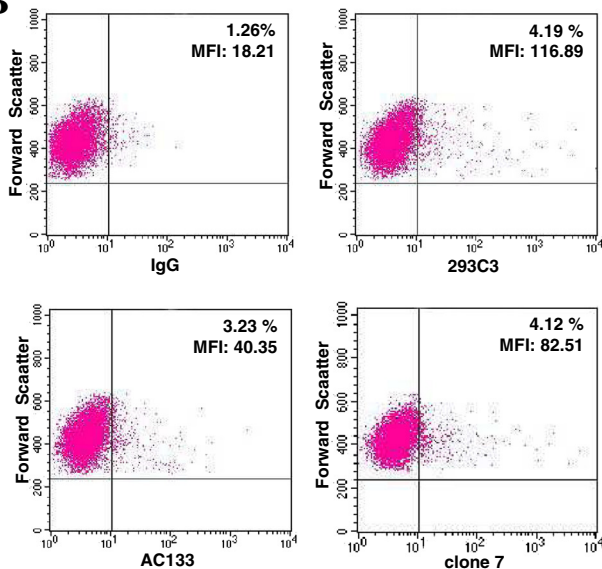**E**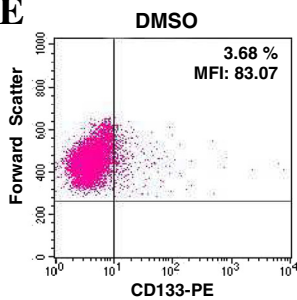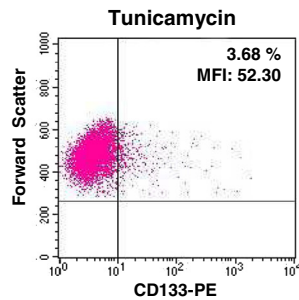**C**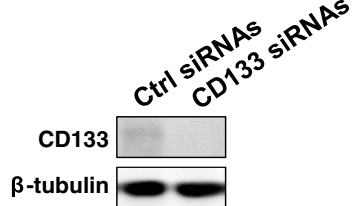**D**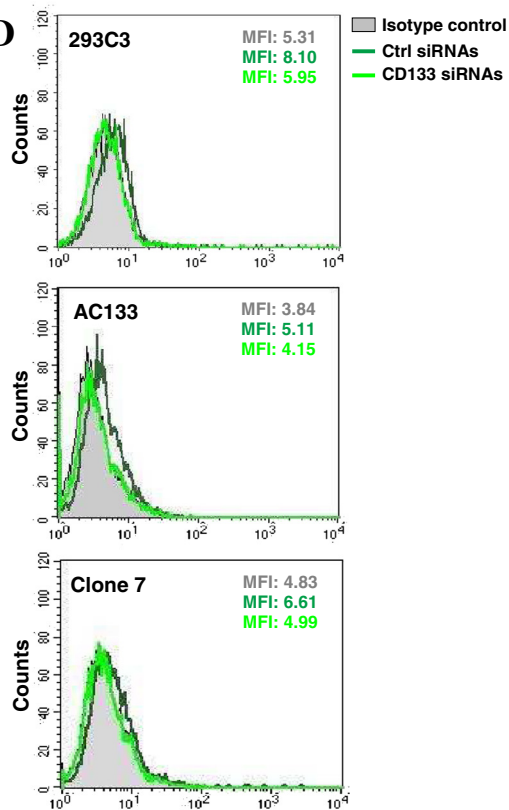

Supplement: MOESM2 [file 9552420]
